# Supplementary material for: GSK3 as a Regulator of Cytoskeleton Architecture: Consequences for Health and Disease
Source: MDPI journal article supplement (doi:10.3390/cells10082092), 2021-08-14
Supplement: s1 [file s1]

**Supplementary Table S2.** Main upstream proteins/pathways regulating GSK3 $\beta$  activity mentioned in the present paper, cellular processes they stimulate, and their influence on the activity of GSK3 $\beta$ , together with the experimental model and methods of detection used in the reviewed papers.

| GSK3 $\beta$ regulators | Function of active protein/pathway                                                          | Effects of active protein/pathway on GSK3 $\beta$ activity | Experimental model                                                   | Detection method                                                      | Source |
|-------------------------|---------------------------------------------------------------------------------------------|------------------------------------------------------------|----------------------------------------------------------------------|-----------------------------------------------------------------------|--------|
| PI3K/Akt                | cell differentiation                                                                        | negative regulation                                        | rat primary cultures of hippocampal neurons                          | Western blot, immunocytochemistry                                     | [58]   |
|                         |                                                                                             |                                                            |                                                                      | Western blot                                                          | [59]   |
| RhoA                    | cell migration                                                                              | negative regulation                                        | human HEPG2 cancer cell line                                         | Western blot                                                          | [131]  |
| Cdc42/Par6/ PKC $\zeta$ | asymmetric cell division promoted by interactions of APC with the plus ends of microtubules | negative regulation                                        | rat primary cultures of astrocytes                                   | Western blot, immunocytochemistry, cell migration assay               | [51]   |
| RhoGTPase/Cdc42/PKC     | prevention of actin branching and lamellipodia formation                                    | negative regulation                                        | rat primary cultures of astrocytes                                   | Western blot, immunocytochemistry, cell migration assay               | [51]   |
| ROCK1                   | amoeboid movement stimulation                                                               | negative regulation                                        | RAW 264.7 mouse macrophages, human embryonic kidney cell line HEK293 | Western blot                                                          | [108]  |
| ErbB2                   | microtubules assembly, cell motility                                                        | negative regulation                                        | Human Breast Cancer Cell Line SK-BR-3                                | Western blot, immunocytochemistry, time-lapse fluorescence microscopy | [142]  |
