# Supplementary material for: GSK3 as a Regulator of Cytoskeleton Architecture: Consequences for Health and Disease
Source: MDPI journal article supplement (doi:10.3390/cells10082092), 2021-08-14
Supplement: s1 [file s1]

**Supplementary Table S1.** Main (direct and indirect) GSK3 targets mentioned in the present paper, their cellular roles, major effects of the GSK3-target protein interactions, together with the experimental model and methods of detection used in the reviewed papers.

| GSK3 $\beta$ target          | Function of target protein                              | Effects of active GSK3 $\beta$ on target activity/expression           | Experimental model                                                                              | Detection method                       | Source |
|------------------------------|---------------------------------------------------------|------------------------------------------------------------------------|-------------------------------------------------------------------------------------------------|----------------------------------------|--------|
| Metabolic/signaling proteins |                                                         |                                                                        |                                                                                                 |                                        |        |
| cyclin D1                    | cell cycle progression                                  | expression promotion                                                   | rat primary cultures of cerebellar granule neurons                                              | Western blot                           | [21]   |
| cyclin E                     | cell cycle progression                                  | expression promotion                                                   | rat primary cultures of cerebellar granule neurons                                              | Western blot, immunocytochemistry      | [21]   |
| retinoblastoma protein       | cell cycle progression, uncontrolled cell proliferation | positive regulation (phosphorylation, which occurs during PD)          | rat primary cultures of cerebellar granule neurons                                              | Western blot, immunocytochemistry      | [21]   |
| APC                          | microtubules assembly, cell migration, axon elongation  | negative regulation                                                    | rat primary astrocyte cell culture                                                              | cell migration assay                   | [51]   |
|                              |                                                         |                                                                        | mouse embryonic dorsal root ganglia cell culture                                                | immunocytochemistry                    | [61]   |
|                              |                                                         |                                                                        | mouse embryonic fibroblasts                                                                     | immunocytochemistry                    | [140]  |
| PTEN                         | stops axon branching                                    | positive regulation                                                    | mouse dentate gyri                                                                              | Western blot, immunohistochemistry     | [68]   |
| Rac1                         | cell migration                                          | positive regulation                                                    | Madin-Darby Canine Kidney cells                                                                 | Western blot                           | [103]  |
| FAK                          | cell adhesion and migration                             | positive regulation                                                    | human glioblastoma cell lines (T98G, U87)                                                       | Western blot                           | [104]  |
|                              |                                                         |                                                                        | human pancreatic cell lines (MIA PaCa-2, PANC-1, BxPC-3)                                        | Western blot, immunohistochemistry     | [105]  |
|                              |                                                         |                                                                        | Rat2 fibroblasts                                                                                | Western blot, immunoprecipitation      | [114]  |
|                              |                                                         |                                                                        | human osteosarcoma cell line (MG-63)                                                            | immunocytochemistry                    | [126]  |
|                              |                                                         |                                                                        | human melanoma cell lines (WM793, 1205Lu, WM9)                                                  | immunocytochemistry, mass spectrometry | [149]  |
|                              |                                                         |                                                                        |                                                                                                 |                                        |        |
| WASF2                        | cell migration                                          | positive regulation                                                    | human breast adenocarcinoma cell line (MDA-MB_231)                                              | Western blot                           | [117]  |
| TRAK1                        | mitochondrial anterograde movement                      | positive regulation (Gsk3 $\beta$ binds to TARK1)                      | embryonic human kidney cell line HEK 293, human neuroblast form neural tissue cell line SH-SY5Y | immunoprecipitation                    | [176]  |
|                              |                                                         |                                                                        | mouse primary cultures of hippocampal neurons                                                   | mitochondrial movement measurement     |        |
| Structural proteins          |                                                         |                                                                        |                                                                                                 |                                        |        |
| Astrin                       | spindle organisation                                    | allows Astrin to interact with microtubules and kinetochore            | in vitro (yeast two-hybrid assay)                                                               | Western blot, immunocytochemistry      | [22]   |
|                              |                                                         |                                                                        | human HeLa cell line                                                                            | Western blot, immunocytochemistry      |        |
| Ninein                       | microtubules organisation during cell division          | inhibits Ninein accumulation in centrosomes and promotes proliferation | human tissues (heart, brain, placenta, lung, liver, skeletal muscle, kidney, pancreas           | PCR, Northern blot                     | [25]   |
|                              |                                                         |                                                                        | in vitro (yeast two-hybrid assay)                                                               | Western blot                           | [26]   |

|                              |                                                                            |                      |                                                                                                 |                                                                                          |       |
|------------------------------|----------------------------------------------------------------------------|----------------------|-------------------------------------------------------------------------------------------------|------------------------------------------------------------------------------------------|-------|
| CRMP2                        | microtubules assembly, axon branching                                      | negative regulation  | human embryonic kidney cell line HEK293, human neuroblast form neural tissue cell line SH-SY5Y  | SDS-PAGE, autoradiography, mass spectrometry                                             | [60]  |
| Arp2/3                       | dendritic spines development, actin cytoskeleton branching in lamellipodia | positive regulation  | aneuploid immortal keratinocyte cell line from adult human skin HaCaT                           | immunocytochemistry                                                                      | [76]  |
| Dynamin I                    | synaptic vesicles endocytosis                                              | positive regulation  | rat primary neuronal cultures                                                                   | Western blot, autoradiography, SDS-PAGE                                                  | [88]  |
| MT1-MMP                      | tumor invasion                                                             | expression promotion | human glioblastoma cell lines (U87, U25, T98G)                                                  | Western blot, PCR                                                                        | [104] |
| LCRMP-1                      | filopodia formation, cell migration, cancer invasion enhancer              | positive regulation  | primary human lung cancer cells                                                                 | Western blot, protein sequences alignment                                                | [106] |
| EB1                          | cell migration                                                             | negative regulation  | human non-small lung carcinoma A549 cell line                                                   | Western blot, indirect immunofluorescence analysis                                       | [107] |
| CLASP2                       | cell migration                                                             | negative regulation  | human breast SkBr3 carcinoma cell line                                                          | Western blot, time-lapse fluorescence microscopy                                         | [142] |
|                              |                                                                            |                      | human keratinocyte HaCaT call line, human cervix epithelial HeLa cell line                      | Western blot, immunoprecipitation, SDS-PAGE                                              | [143] |
| ACF7                         | actin binging protein, cell migration                                      | negative regulation  | hair follicle stem cells (HF-SC)                                                                | Western blot, SDS-PAGE, autoradiography                                                  | [144] |
| Paxillin                     | cell migration                                                             | positive regulation  | RAW 264.7 mouse macrophages                                                                     | Western blot                                                                             | [150] |
|                              |                                                                            |                      | embryonic human kidney cell line HEK 293, human neuroblast form neural tissue cell line SH-SY5Y | immunoprecipitation                                                                      | [176] |
| Tau                          | microtubule assembly                                                       | negative regulation  | mouse primary cultures of hippocampal neurons                                                   | immunocytochemistry, live-imaging and quantification of axonal transport of mitochondria | [173] |
| <b>Transcription factors</b> |                                                                            |                      |                                                                                                 |                                                                                          |       |
| E2F-1                        | cell cycle progression                                                     | expression promotion | rat primary cultures of cerebellar granule neurons                                              | Western blot, PCR, immunocytochemistry                                                   | [21]  |
| AP-1                         | differentiation, proliferation and apoptosis                               | negative regulation  | JB6 P+ mouse epidermal cell line (Cl 41)                                                        | activity measurement                                                                     | [27]  |
| NF-κB                        | inflammatory processes, cell proliferation, differentiation and survival   | negative regulation  | rat primary cultures of cerebellar granule neurons                                              | ELISA                                                                                    | [33]  |
|                              |                                                                            |                      | rat primary cultures of astrocytes                                                              | Western blot                                                                             | [34]  |
| β-catenin                    | cell proliferation and differentiation                                     | negative regulation  | human embryonic kidney cell line HEK293                                                         | Western blot                                                                             | [35]  |

|       |                                                      |                     |                                                        |                                                                       |       |
|-------|------------------------------------------------------|---------------------|--------------------------------------------------------|-----------------------------------------------------------------------|-------|
| MAP1B | cell migration,<br>axonal growth<br>and regeneration | positive regulation | cortical neurons                                       | Western blot                                                          | [46]  |
|       |                                                      |                     | mouse embryonic<br>dorsal root ganglia cell<br>culture | Western blot                                                          | [61]  |
| CEBPD | microglia<br>activation                              | positive regulation | human glioblastoma-<br>astrocytoma cell line<br>U373MG | Western blot, wound-<br>healing migration assays,<br>chemotaxis assay | [101] |
